# Supplementary material for: BCOR Internal Tandem Duplication Expression in Neural Stem Cells Promotes Growth, Invasion, and Expression of PRC2 Targets
Source: MDPI journal article supplement (doi:10.3390/ijms22083913), 2021-04-10

Supplementary figure 1

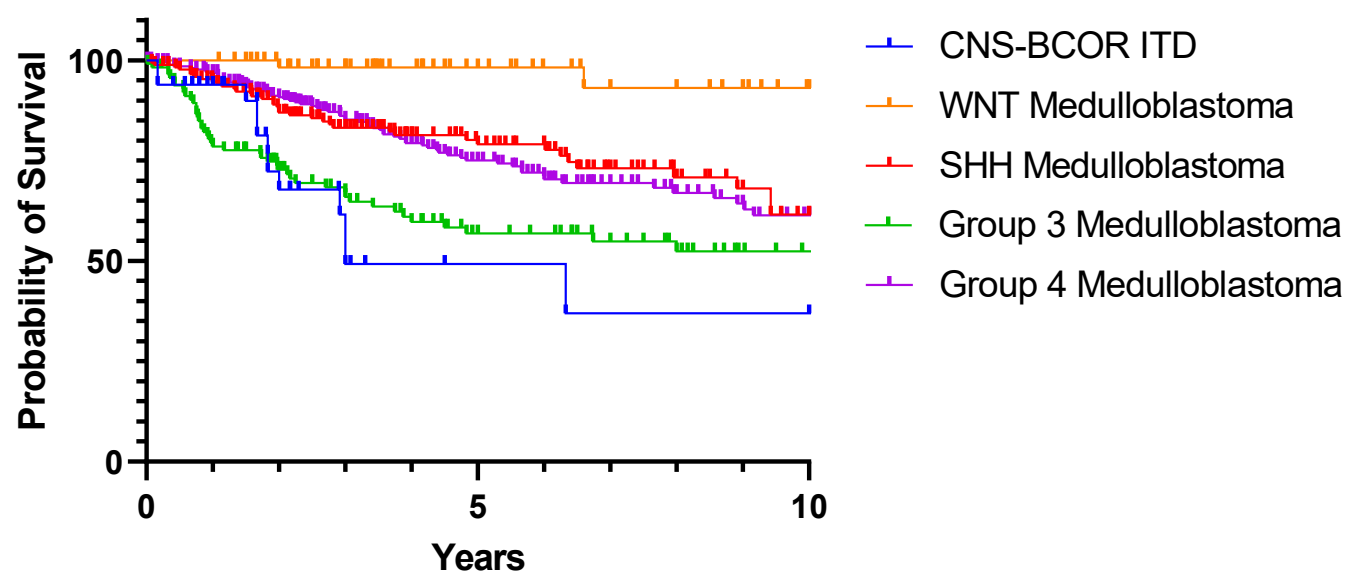

|                     |    |
|---------------------|----|
| CNS-BCOR ITD        |    |
| Number of cases     | 33 |
| # censored subjects | 21 |
| # deaths            | 12 |
| Median survival     | 3  |

Supplementary figure 2

A

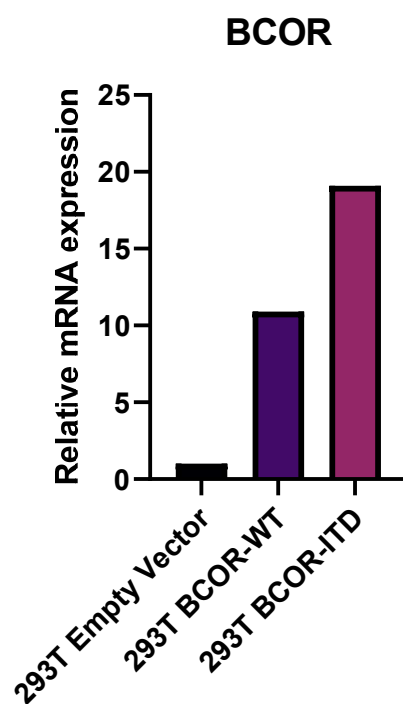

B

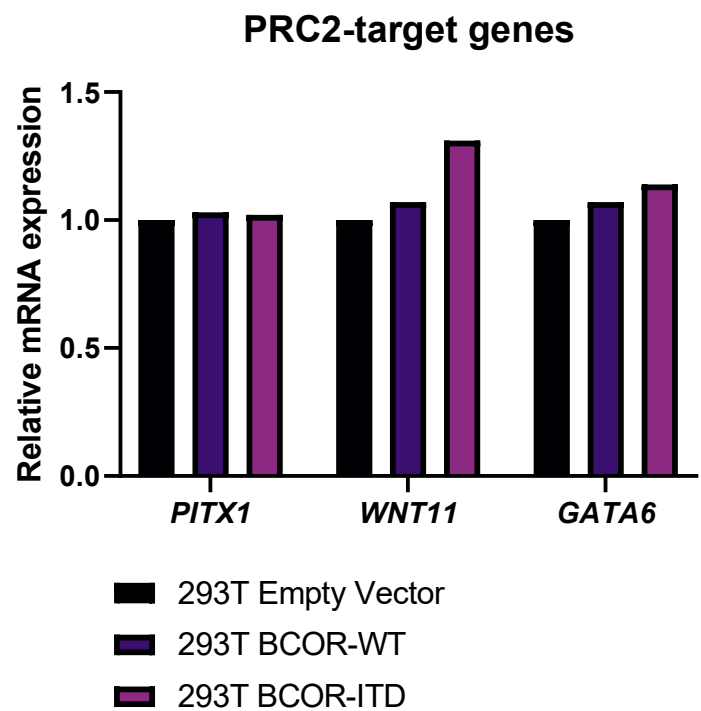

C

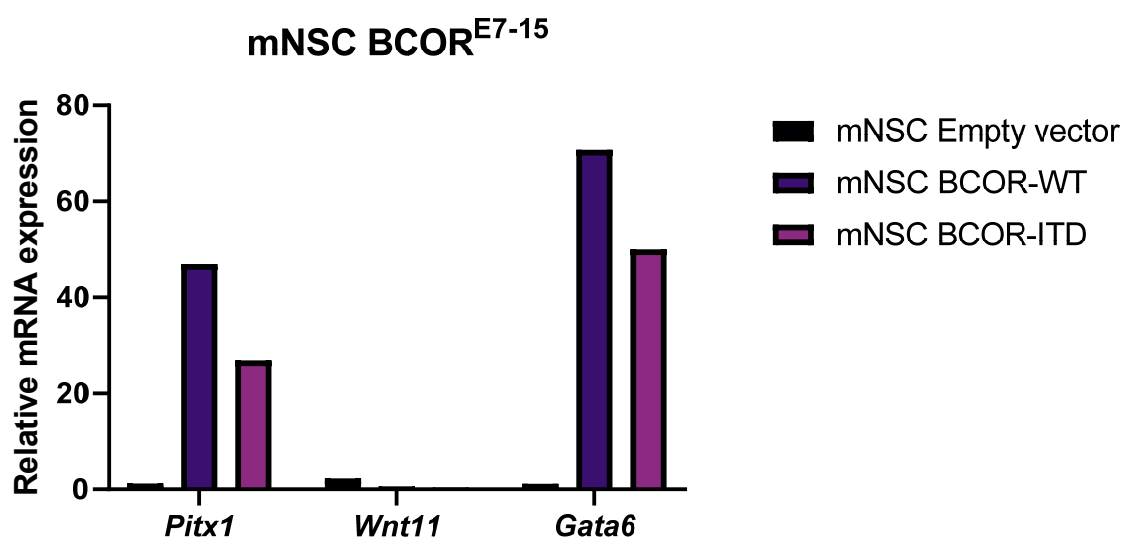

Supplementary figure 3

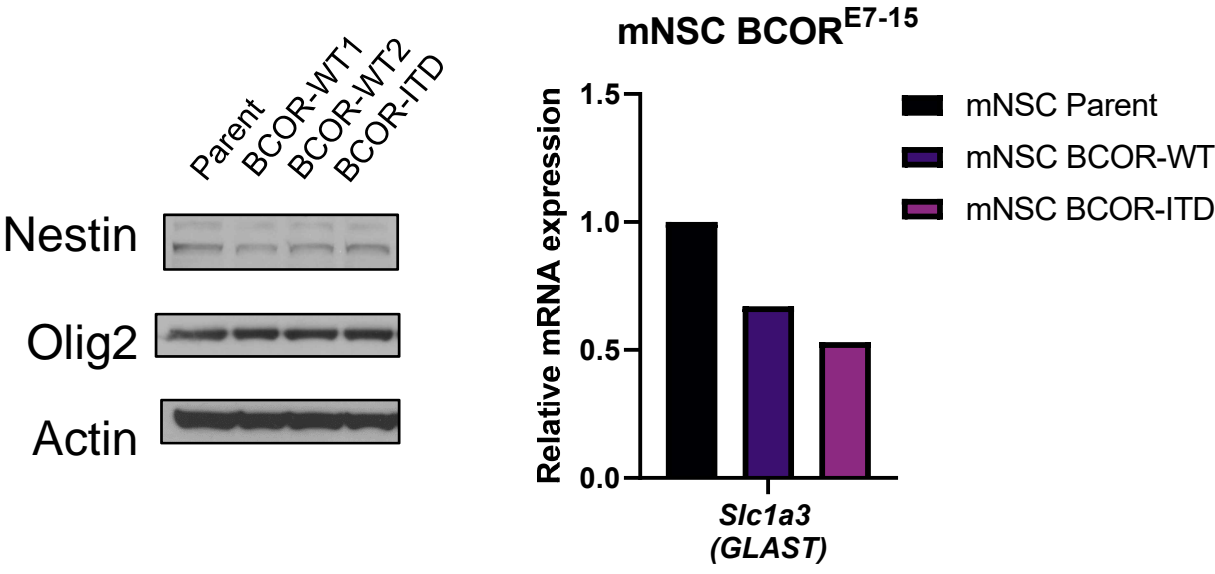

Supplement: s1 [file s1]
